# Supplementary material for: Aftermath of the COVID-19 Pandemic: Resilience and Mental Health of Emerging Adult University Students
Source: MDPI journal article supplement (doi:10.3390/ijerph20206911), 2023-10-11
Supplement: s1 [file s1]

# Aftermath of the COVID-19 Pandemic: Resilience and Mental Health of Emerging Adults University Students

Sophie Leontopoulou

Department of Primary Education, University of Ioannina, 45110 Ioannina, Greece; sleon@uoi.gr

The scales used in the study are presented below.

## 1. Coronavirus Impacts Questionnaire (Short version)

1. The coronavirus (COVID-19) has negatively affected me from a financial point of view.  
1      2      3      4      5      6      7  
Totally                      Neither Agree,                      Totally  
Disagree                      nor Disagree                      Agree
2. I have lost income related to my employment due to the coronavirus (COVID-19).  
1      2      3      4      5      6      7  
Totally                      Neither Agree,                      Totally  
Disagree                      nor Disagree                      Agree
3. I have had difficulties finding necessary supplies (food, toilet paper) due to the coronavirus (COVID-19).  
1      2      3      4      5      6      7  
Totally                      Neither Agree,                      Totally  
Disagree                      nor Disagree                      Agree
4. It was difficult for me to find things I need due to the coronavirus (COVID-19).  
1      2      3      4      5      6      7  
Totally                      Neither Agree,                      Totally  
Disagree                      nor Disagree                      Agree
5. I have been depressed due to the coronavirus (COVID-19).  
1      2      3      4      5      6      7  
Totally                      Neither Agree,                      Totally  
Disagree                      nor Disagree                      Agree
6. The coronavirus (COVID-19) pandemic has negatively affected my mental health.  
1      2      3      4      5      6      7  
Totally                      Neither Agree,                      Totally  
Disagree                      nor Disagree                      Agree

## 2. Short General Health Questionnaire (GHQ 12)

During the last 4 weeks, have you:

---

1. Been able to concentrate on what you're doing?  
1 = Better than usual 2 = Same as usual 3 = Less than usual 4 = Much less than usual
2. Lost much sleep over worry?  
1 = Not at all 2 = No more than usual 3 = Rather more than usual 4 = Much more than usual
3. Felt you were playing a useful part in things?  
1 = More so than usual 2 = Same as usual 3 = Less useful than usual 4 = Much less useful
4. Felt capable of making decisions about things?  
1 = More so than usual 2 = Same as usual 3 = Less so than usual 4 = Much less capable
5. Felt constantly under strain?  
1 = Not at all 2 = No more than usual 3 = Rather more than usual 4 = Much more than usual
6. Felt you couldn't overcome your difficulties?  
1 = Not at all 2 = No more than usual 3 = Rather more than usual 4 = Much more than usual
7. Been able to enjoy your normal day-to-day activities?  
1 = More so than usual 2 = Same as usual 3 = Less so than usual 4 = Much less than usual
8. Been able to face up to your problems?  
1 = More so than usual 2 = Same as usual 3 = Less so than usual 4 = Much less able
9. Been feeling unhappy and depressed?  
1 = Not at all 2 = No more than usual 3 = Rather more than usual 4 = Much more than usual
10. Been losing confidence in yourself?  
1 = Not at all 2 = No more than usual 3 = Rather more than usual 4 = Much more than usual
11. Been thinking of yourself as a worthless person?  
1 = Not at all 2 = No more than usual 3 = Rather more than usual 4 = Much more than usual
12. Been feeling reasonably happy, all things considered?  
1 = More so than usual 2 = About same as usual 3 = Less so than usual 4 = Much less than usual

### 3. Resilience Scale

1. When I make plans I follow through with them.  

|                  |   |   |                             |   |               |   |
|------------------|---|---|-----------------------------|---|---------------|---|
| 1                | 2 | 3 | 4                           | 5 | 6             | 7 |
| Totally Disagree |   |   | Neither Agree, nor Disagree |   | Totally Agree |   |
2. I usually manage one way or another.  

|                  |   |   |                             |   |               |   |
|------------------|---|---|-----------------------------|---|---------------|---|
| 1                | 2 | 3 | 4                           | 5 | 6             | 7 |
| Totally Disagree |   |   | Neither Agree, nor Disagree |   | Totally Agree |   |
3. I feel proud that I have accomplished things in my life.  

|                  |   |   |                             |   |               |   |
|------------------|---|---|-----------------------------|---|---------------|---|
| 1                | 2 | 3 | 4                           | 5 | 6             | 7 |
| Totally Disagree |   |   | Neither Agree, nor Disagree |   | Totally Agree |   |
4. I usually take things in my stride.  

|                  |   |   |                             |   |               |   |
|------------------|---|---|-----------------------------|---|---------------|---|
| 1                | 2 | 3 | 4                           | 5 | 6             | 7 |
| Totally Disagree |   |   | Neither Agree, nor Disagree |   | Totally Agree |   |
5. I am friends with myself.  

|                  |   |   |                             |   |               |   |
|------------------|---|---|-----------------------------|---|---------------|---|
| 1                | 2 | 3 | 4                           | 5 | 6             | 7 |
| Totally Disagree |   |   | Neither Agree, nor Disagree |   | Totally Agree |   |

6. I feel that I can handle many things at a time.
- |                  |   |   |                             |   |               |   |
|------------------|---|---|-----------------------------|---|---------------|---|
| 1                | 2 | 3 | 4                           | 5 | 6             | 7 |
| Totally Disagree |   |   | Neither Agree, nor Disagree |   | Totally Agree |   |
7. I am determined.
- |                  |   |   |                             |   |               |   |
|------------------|---|---|-----------------------------|---|---------------|---|
| 1                | 2 | 3 | 4                           | 5 | 6             | 7 |
| Totally Disagree |   |   | Neither Agree, nor Disagree |   | Totally Agree |   |
8. I have self-discipline.
- |                  |   |   |                             |   |               |   |
|------------------|---|---|-----------------------------|---|---------------|---|
| 1                | 2 | 3 | 4                           | 5 | 6             | 7 |
| Totally Disagree |   |   | Neither Agree, nor Disagree |   | Totally Agree |   |
9. I keep interested in things.
- |                  |   |   |                             |   |               |   |
|------------------|---|---|-----------------------------|---|---------------|---|
| 1                | 2 | 3 | 4                           | 5 | 6             | 7 |
| Totally Disagree |   |   | Neither Agree, nor Disagree |   | Totally Agree |   |
10. I can usually find something to laugh about.
- |                  |   |   |                             |   |               |   |
|------------------|---|---|-----------------------------|---|---------------|---|
| 1                | 2 | 3 | 4                           | 5 | 6             | 7 |
| Totally Disagree |   |   | Neither Agree, nor Disagree |   | Totally Agree |   |
11. My belief in myself gets me through hard times.
- |                  |   |   |                             |   |               |   |
|------------------|---|---|-----------------------------|---|---------------|---|
| 1                | 2 | 3 | 4                           | 5 | 6             | 7 |
| Totally Disagree |   |   | Neither Agree, nor Disagree |   | Totally Agree |   |
12. I can usually look at a situation in a number of ways.
- |                  |   |   |                             |   |               |   |
|------------------|---|---|-----------------------------|---|---------------|---|
| 1                | 2 | 3 | 4                           | 5 | 6             | 7 |
| Totally Disagree |   |   | Neither Agree, nor Disagree |   | Totally Agree |   |
13. My life has meaning.
- |                  |   |   |                             |   |               |   |
|------------------|---|---|-----------------------------|---|---------------|---|
| 1                | 2 | 3 | 4                           | 5 | 6             | 7 |
| Totally Disagree |   |   | Neither Agree, nor Disagree |   | Totally Agree |   |
14. When I am in a difficult situation, I can usually find my way out of it.
- |                  |   |   |                             |   |               |   |
|------------------|---|---|-----------------------------|---|---------------|---|
| 1                | 2 | 3 | 4                           | 5 | 6             | 7 |
| Totally Disagree |   |   | Neither Agree, nor Disagree |   | Totally Agree |   |
15. I have enough energy to do what I have to do.
- |                  |   |   |                             |   |               |   |
|------------------|---|---|-----------------------------|---|---------------|---|
| 1                | 2 | 3 | 4                           | 5 | 6             | 7 |
| Totally Disagree |   |   | Neither Agree, nor Disagree |   | Totally Agree |   |
